# Supplementary material for: Augmenting the technology acceptance model with trust model for the initial adoption of a blockchain-based system
Source: PeerJ journal article supplement (doi:10.7717/peerj-cs.502), 2021-05-21
Supplement: Supplemental_Article_S1.pdf [file Supplemental_Article_S1.pdf]

## Survey Questionnaire for Pretest

\* 1. Please provide a random ID. You may generate a random ID on [this page](#).

**Keep a note of this ID as you need to put the same ID in the next survey.**

\* 2. Please indicate your Gender

Female

Male

Other

\* 3. Please indicate your Age

18 to 24

25 to 34

35 to 44

45 to 54

55 to 64

65 to 74

75 or older

\* 4. Please indicate your highest education level

Graduated from high school

Bachelors

Masters

PhD

Other (please specify)

5. Which of the following best describes your current occupation/field of study?

- Business and Financial Operations Occupations
- Computer Science
- Engineering
- Life, Physical, and Social Science
- Arts, Design, Entertainment, Sports, and Media
- Education
- Other Sciences
- Other (please specify)

\* 6. What continent are you from?

- Africa
- Asia
- Europe
- Oceania
- North America
- South America

\* 7. I am familiar with research social networks ( e.g. ResearchGate, LinkedIn, ORCID).

|                       |                       |                       |                       |                       |                       |                       |
|-----------------------|-----------------------|-----------------------|-----------------------|-----------------------|-----------------------|-----------------------|
| strongly disagree     | moderately disagree   | slightly disagree     | neither               | slightly agree        | moderately agree      | strongly agree        |
| <input type="radio"/> | <input type="radio"/> | <input type="radio"/> | <input type="radio"/> | <input type="radio"/> | <input type="radio"/> | <input type="radio"/> |

\* 8. I am familiar with online shopping sites ( e.g. Disney Store, Walmart).

|                       |                       |                       |                       |                       |                       |                       |
|-----------------------|-----------------------|-----------------------|-----------------------|-----------------------|-----------------------|-----------------------|
| strongly disagree     | moderately disagree   | slightly disagree     | neither               | slightly agree        | moderately agree      | strongly agree        |
| <input type="radio"/> | <input type="radio"/> | <input type="radio"/> | <input type="radio"/> | <input type="radio"/> | <input type="radio"/> | <input type="radio"/> |

\* 9. I am familiar with blockchain and smart contracts.

|                       |                       |                       |                       |                       |                       |                       |
|-----------------------|-----------------------|-----------------------|-----------------------|-----------------------|-----------------------|-----------------------|
| strongly disagree     | moderately disagree   | slightly disagree     | neither               | slightly agree        | moderately agree      | strongly agree        |
| <input type="radio"/> | <input type="radio"/> | <input type="radio"/> | <input type="radio"/> | <input type="radio"/> | <input type="radio"/> | <input type="radio"/> |

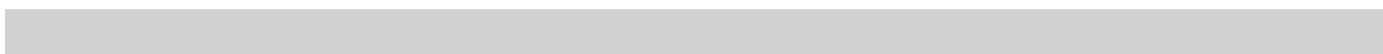

**We want to introduce you to the advantages of blockchain and smart contract technologies, how they**



\* 14. I am confident in the blockchain-based system.

|                       |                       |                       |                       |                       |                       |                       |
|-----------------------|-----------------------|-----------------------|-----------------------|-----------------------|-----------------------|-----------------------|
| strongly disagree     | moderately disagree   | slightly disagree     | neither               | slightly agree        | moderately agree      | strongly agree        |
| <input type="radio"/> | <input type="radio"/> | <input type="radio"/> | <input type="radio"/> | <input type="radio"/> | <input type="radio"/> | <input type="radio"/> |

\* 15. The blockchain-based system protects my privacy.

|                       |                       |                       |                       |                       |                       |                       |
|-----------------------|-----------------------|-----------------------|-----------------------|-----------------------|-----------------------|-----------------------|
| strongly disagree     | moderately disagree   | slightly disagree     | neither               | slightly agree        | moderately agree      | strongly agree        |
| <input type="radio"/> | <input type="radio"/> | <input type="radio"/> | <input type="radio"/> | <input type="radio"/> | <input type="radio"/> | <input type="radio"/> |

\* 16. The blockchain-based system secures my information.

|                       |                       |                       |                       |                       |                       |                       |
|-----------------------|-----------------------|-----------------------|-----------------------|-----------------------|-----------------------|-----------------------|
| strongly disagree     | moderately disagree   | slightly disagree     | neither               | slightly agree        | moderately agree      | strongly agree        |
| <input type="radio"/> | <input type="radio"/> | <input type="radio"/> | <input type="radio"/> | <input type="radio"/> | <input type="radio"/> | <input type="radio"/> |

\* 17. The blockchain-based system has integrity.

|                       |                       |                       |                       |                       |                       |                       |
|-----------------------|-----------------------|-----------------------|-----------------------|-----------------------|-----------------------|-----------------------|
| strongly disagree     | moderately disagree   | slightly disagree     | neither               | slightly agree        | moderately agree      | strongly agree        |
| <input type="radio"/> | <input type="radio"/> | <input type="radio"/> | <input type="radio"/> | <input type="radio"/> | <input type="radio"/> | <input type="radio"/> |

\* 18. The blockchain-based system is dependable.

|                       |                       |                       |                       |                       |                       |                       |
|-----------------------|-----------------------|-----------------------|-----------------------|-----------------------|-----------------------|-----------------------|
| strongly disagree     | moderately disagree   | slightly disagree     | neither               | slightly agree        | moderately agree      | strongly agree        |
| <input type="radio"/> | <input type="radio"/> | <input type="radio"/> | <input type="radio"/> | <input type="radio"/> | <input type="radio"/> | <input type="radio"/> |

\* 19. The blockchain-based system can be relied on to keep its promises.

|                       |                       |                       |                       |                       |                       |                       |
|-----------------------|-----------------------|-----------------------|-----------------------|-----------------------|-----------------------|-----------------------|
| strongly disagree     | moderately disagree   | slightly disagree     | neither               | slightly agree        | moderately agree      | strongly agree        |
| <input type="radio"/> | <input type="radio"/> | <input type="radio"/> | <input type="radio"/> | <input type="radio"/> | <input type="radio"/> | <input type="radio"/> |

\* 20. I can trust a blockchain-based system.

|                       |                       |                       |                       |                       |                       |                       |
|-----------------------|-----------------------|-----------------------|-----------------------|-----------------------|-----------------------|-----------------------|
| strongly disagree     | moderately disagree   | slightly disagree     | neither               | slightly agree        | moderately agree      | strongly agree        |
| <input type="radio"/> | <input type="radio"/> | <input type="radio"/> | <input type="radio"/> | <input type="radio"/> | <input type="radio"/> | <input type="radio"/> |

\* 21. I am familiar with a blockchain-based system.

|                       |                       |                       |                       |                       |                       |                       |
|-----------------------|-----------------------|-----------------------|-----------------------|-----------------------|-----------------------|-----------------------|
| strongly disagree     | moderately disagree   | slightly disagree     | neither               | slightly agree        | moderately agree      | strongly agree        |
| <input type="radio"/> | <input type="radio"/> | <input type="radio"/> | <input type="radio"/> | <input type="radio"/> | <input type="radio"/> | <input type="radio"/> |

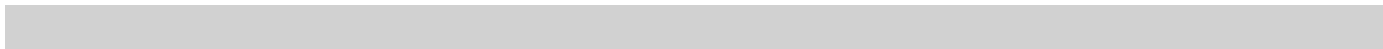





\* 35. In my opinion, it would be desirable for me to use the blockchain-based system.

|                       |                       |                       |                       |                       |                       |                       |
|-----------------------|-----------------------|-----------------------|-----------------------|-----------------------|-----------------------|-----------------------|
| strongly disagree     | moderately disagree   | slightly disagree     | neither               | slightly agree        | moderately agree      | strongly agree        |
| <input type="radio"/> | <input type="radio"/> | <input type="radio"/> | <input type="radio"/> | <input type="radio"/> | <input type="radio"/> | <input type="radio"/> |

\* 36. It would be good for me to use the blockchain-based system.

|                       |                       |                       |                       |                       |                       |                       |
|-----------------------|-----------------------|-----------------------|-----------------------|-----------------------|-----------------------|-----------------------|
| strongly disagree     | moderately disagree   | slightly disagree     | neither               | slightly agree        | moderately agree      | strongly agree        |
| <input type="radio"/> | <input type="radio"/> | <input type="radio"/> | <input type="radio"/> | <input type="radio"/> | <input type="radio"/> | <input type="radio"/> |

\* 37. Do you have any other comments, questions, or concerns?
