# Supplementary material for: Augmenting the technology acceptance model with trust model for the initial adoption of a blockchain-based system
Source: PeerJ journal article supplement (doi:10.7717/peerj-cs.502), 2021-05-21
Supplement: Supplemental_Article_S3.pdf [file Supplemental_Article_S3.pdf]

\* 39. I believe that the information I put on this system can not be misused.

|                       |                       |                       |                       |                       |                       |                       |
|-----------------------|-----------------------|-----------------------|-----------------------|-----------------------|-----------------------|-----------------------|
| strongly disagree     | moderately disagree   | slightly disagree     | neither               | slightly agree        | moderately agree      | strongly agree        |
| <input type="radio"/> | <input type="radio"/> | <input type="radio"/> | <input type="radio"/> | <input type="radio"/> | <input type="radio"/> | <input type="radio"/> |

\* 40. I believe that the blockchain accounts that I use on this system can not be intercepted by someone else.

|                       |                       |                       |                       |                       |                       |                       |
|-----------------------|-----------------------|-----------------------|-----------------------|-----------------------|-----------------------|-----------------------|
| strongly disagree     | moderately disagree   | slightly disagree     | neither               | slightly agree        | moderately agree      | strongly agree        |
| <input type="radio"/> | <input type="radio"/> | <input type="radio"/> | <input type="radio"/> | <input type="radio"/> | <input type="radio"/> | <input type="radio"/> |

\* 41. I believe that using the blockchain-based system would be beneficial for me.

|                       |                       |                       |                       |                       |                       |                       |
|-----------------------|-----------------------|-----------------------|-----------------------|-----------------------|-----------------------|-----------------------|
| strongly disagree     | moderately disagree   | slightly disagree     | neither               | slightly agree        | moderately agree      | strongly agree        |
| <input type="radio"/> | <input type="radio"/> | <input type="radio"/> | <input type="radio"/> | <input type="radio"/> | <input type="radio"/> | <input type="radio"/> |

\* 42. In my opinion, it would be desirable for me to use the blockchain-based system.

|                       |                       |                       |                       |                       |                       |                       |
|-----------------------|-----------------------|-----------------------|-----------------------|-----------------------|-----------------------|-----------------------|
| strongly disagree     | moderately disagree   | slightly disagree     | neither               | slightly agree        | moderately agree      | strongly agree        |
| <input type="radio"/> | <input type="radio"/> | <input type="radio"/> | <input type="radio"/> | <input type="radio"/> | <input type="radio"/> | <input type="radio"/> |

\* 43. It would be good for me to use the blockchain-based system.

|                       |                       |                       |                       |                       |                       |                       |
|-----------------------|-----------------------|-----------------------|-----------------------|-----------------------|-----------------------|-----------------------|
| strongly disagree     | moderately disagree   | slightly disagree     | neither               | slightly agree        | moderately agree      | strongly agree        |
| <input type="radio"/> | <input type="radio"/> | <input type="radio"/> | <input type="radio"/> | <input type="radio"/> | <input type="radio"/> | <input type="radio"/> |

\* 44. Do you have any other comments, questions, or concerns?
