# Supplementary material for: Augmenting the technology acceptance model with trust model for the initial adoption of a blockchain-based system
Source: PeerJ journal article supplement (doi:10.7717/peerj-cs.502), 2021-05-21
Supplement: Supplemental_Data_S1.pdf [file Supplemental_Data_S1.pdf]

| <b>Indicators</b> | <b>No.</b> | <b>Missing</b> | <b>Mean</b> | <b>Median</b> | <b>Min</b> | <b>Max</b> | <b>Standard Deviation</b> | <b>Excess Kurtosis</b> | <b>Skewness</b> |
|-------------------|------------|----------------|-------------|---------------|------------|------------|---------------------------|------------------------|-----------------|
| PS1               | 1          | 0              | 5.88        | 6             | 3          | 7          | 0.986                     | 0.708                  | -0.96           |
| PS2               | 2          | 0              | 5.74        | 6             | 2          | 7          | 1.22                      | 0.225                  | -0.904          |
| PS3               | 3          | 0              | 5.19        | 6             | 1          | 7          | 1.513                     | -0.074                 | -0.807          |
| T1                | 4          | 0              | 5.99        | 6             | 4          | 7          | 0.83                      | -0.505                 | -0.408          |
| T2                | 5          | 0              | 5.74        | 6             | 4          | 7          | 0.945                     | -0.75                  | -0.34           |
| T3                | 6          | 0              | 5.45        | 6             | 1          | 7          | 1.243                     | 1.375                  | -0.952          |
| T4                | 7          | 0              | 5.8         | 6             | 1          | 7          | 1.078                     | 3.779                  | -1.301          |
| T5                | 8          | 0              | 6           | 6             | 4          | 7          | 0.915                     | -0.612                 | -0.54           |
| T6                | 9          | 0              | 5.64        | 6             | 3          | 7          | 1.06                      | -0.762                 | -0.468          |
| T7                | 10         | 0              | 5.76        | 6             | 1          | 7          | 1.076                     | 3.75                   | -1.357          |
| T8                | 11         | 0              | 5.77        | 6             | 4          | 7          | 0.966                     | -0.724                 | -0.436          |
| T9                | 12         | 0              | 5.2         | 5             | 1          | 7          | 1.345                     | 0.405                  | -0.754          |
| AP1               | 13         | 0              | 4.81        | 5             | 2          | 7          | 1.458                     | -1.006                 | -0.09           |
| AP2               | 14         | 0              | 4.82        | 5             | 1          | 7          | 1.501                     | -0.3                   | -0.55           |
| AP3               | 15         | 0              | 5.05        | 6             | 1          | 7          | 1.593                     | -0.454                 | -0.705          |
| AP4               | 16         | 0              | 5.3         | 6             | 2          | 7          | 1.495                     | -0.807                 | -0.576          |
| BP-GC1            | 17         | 0              | 5.32        | 6             | 1          | 7          | 1.603                     | 0.588                  | -1.05           |
| BP-GC2            | 18         | 0              | 4.22        | 4             | 1          | 7          | 1.773                     | -0.927                 | -0.306          |
| BP-GC3            | 19         | 0              | 4.49        | 5             | 1          | 7          | 1.854                     | -0.909                 | -0.238          |
| BP-GC4            | 20         | 0              | 3.5         | 3             | 1          | 7          | 1.803                     | -0.979                 | 0.29            |
| BP-TP1            | 21         | 0              | 5.01        | 5             | 1          | 7          | 1.681                     | 0.094                  | -0.981          |
| BP-TP2            | 22         | 0              | 5.93        | 6             | 2          | 7          | 1.082                     | 1.655                  | -1.104          |
| BP-TP3            | 23         | 0              | 5.3         | 6             | 1          | 7          | 1.625                     | 0.062                  | -0.939          |
| BP-TP4            | 24         | 0              | 5.14        | 6             | 1          | 7          | 1.765                     | 0.129                  | -1.052          |
| ATS1              | 25         | 0              | 5.68        | 6             | 2          | 7          | 1.092                     | 0.292                  | -0.717          |
| ATS2              | 26         | 0              | 5.57        | 6             | 2          | 7          | 1.128                     | 0.036                  | -0.633          |
| ATS3              | 27         | 0              | 5.61        | 6             | 3          | 7          | 1.076                     | -0.897                 | -0.353          |
