# Supplementary material for: Augmenting the technology acceptance model with trust model for the initial adoption of a blockchain-based system
Source: PeerJ journal article supplement (doi:10.7717/peerj-cs.502), 2021-05-21
Supplement: Supplemental_Data_S2.pdf [file Supplemental_Data_S2.pdf]

|       | No. | Missing | Mean  | Median | Min | Max | Standard Deviation | Excess Kurtosis | Skewness |
|-------|-----|---------|-------|--------|-----|-----|--------------------|-----------------|----------|
| PEOU1 | 1   | 0       | 6.254 | 6      | 5   | 7   | 0.689              | -0.855          | -0.389   |
| PEOU2 | 2   | 0       | 6.063 | 6      | 5   | 7   | 0.774              | -1.334          | -0.112   |
| PEOU3 | 3   | 0       | 6.19  | 6      | 3   | 7   | 0.94               | 4.156           | -1.804   |
| PEOU4 | 4   | 0       | 6.063 | 6      | 1   | 7   | 0.906              | 14.264          | -2.75    |
| PEOU5 | 5   | 0       | 6.365 | 6      | 4   | 7   | 0.741              | 1.525           | -1.197   |
| PEOU6 | 6   | 0       | 6.365 | 6      | 5   | 7   | 0.697              | -0.726          | -0.652   |
| PU1   | 7   | 0       | 6.032 | 6      | 3   | 7   | 0.975              | 0.632           | -1.011   |
| PU2   | 8   | 0       | 6     | 6      | 3   | 7   | 0.926              | 0.644           | -0.861   |
| PU3   | 9   | 0       | 5.921 | 6      | 1   | 7   | 1.088              | 5.842           | -1.883   |
| PU4   | 10  | 0       | 6.365 | 6      | 4   | 7   | 0.674              | 1.057           | -0.925   |
| PU5   | 11  | 0       | 6.381 | 7      | 5   | 7   | 0.7                | -0.692          | -0.7     |
| PU6   | 12  | 0       | 6.413 | 7      | 5   | 7   | 0.705              | -0.6            | -0.797   |
| QOS1  | 13  | 0       | 6.19  | 6      | 4   | 7   | 0.794              | 0.092           | -0.752   |
| QOS2  | 14  | 0       | 6.238 | 6      | 4   | 7   | 0.728              | 0.052           | -0.662   |
| QOS3  | 15  | 0       | 6.381 | 6      | 4   | 7   | 0.677              | 1.088           | -0.969   |
| QOS4  | 16  | 0       | 6.397 | 7      | 4   | 7   | 0.746              | 0.439           | -1.045   |
| Enj1  | 17  | 0       | 6.079 | 6      | 3   | 7   | 0.803              | 2.421           | -1.091   |
| Enj2  | 18  | 0       | 6.302 | 6      | 4   | 7   | 0.769              | 0.805           | -1.017   |
| Enj3  | 19  | 0       | 6.19  | 6      | 4   | 7   | 0.814              | -0.115          | -0.733   |
| ITU1  | 20  | 0       | 6.063 | 6      | 4   | 7   | 0.833              | -0.131          | -0.628   |
| ITU2  | 21  | 0       | 6.063 | 6      | 4   | 7   | 0.889              | -0.273          | -0.684   |
| ITU3  | 22  | 0       | 6.063 | 6      | 3   | 7   | 0.871              | 1.847           | -1.161   |
| PS1   | 23  | 0       | 5.73  | 6      | 3   | 7   | 0.84               | 0.596           | -0.434   |
| PS2   | 24  | 0       | 5.841 | 6      | 4   | 7   | 0.963              | -0.75           | -0.436   |
| PS3   | 25  | 0       | 5.794 | 6      | 3   | 7   | 1.041              | 0.035           | -0.694   |
| T1    | 26  | 0       | 6.111 | 6      | 5   | 7   | 0.645              | -0.582          | -0.111   |
| T2    | 27  | 0       | 6.016 | 6      | 3   | 7   | 0.917              | 1.133           | -1.044   |
| T3    | 28  | 0       | 5.81  | 6      | 3   | 7   | 0.99               | -0.159          | -0.609   |
| T4    | 29  | 0       | 6.159 | 6      | 4   | 7   | 0.801              | -0.077          | -0.68    |
| T5    | 30  | 0       | 5.937 | 6      | 3   | 7   | 0.871              | 0.894           | -0.761   |
| T6    | 31  | 0       | 5.905 | 6      | 4   | 7   | 0.849              | -0.336          | -0.451   |
| T7    | 32  | 0       | 5.841 | 6      | 3   | 7   | 0.912              | 0.46            | -0.703   |
| T8    | 33  | 0       | 5.889 | 6      | 3   | 7   | 0.875              | 0.653           | -0.652   |
| T9    | 34  | 0       | 5.921 | 6      | 4   | 7   | 0.841              | -0.216          | -0.501   |
| AP1   | 35  | 0       | 5.762 | 6      | 4   | 7   | 0.904              | -0.82           | -0.163   |
| AP2   | 36  | 0       | 5.667 | 6      | 3   | 7   | 1.054              | 0.167           | -0.704   |
| AP3   | 37  | 0       | 5.397 | 5      | 3   | 7   | 1.134              | -0.793          | -0.239   |
| AP4   | 38  | 0       | 5.492 | 6      | 3   | 7   | 1.344              | -0.589          | -0.767   |
| ATS1  | 39  | 0       | 6.048 | 6      | 4   | 7   | 0.765              | 0.028           | -0.519   |
| ATS2  | 40  | 0       | 5.952 | 6      | 4   | 7   | 0.785              | -0.406          | -0.317   |
| ATS3  | 41  | 0       | 6     | 6      | 4   | 7   | 0.797              | -0.419          | -0.386   |
