# Supplementary material for: Augmenting the technology acceptance model with trust model for the initial adoption of a blockchain-based system
Source: PeerJ journal article supplement (doi:10.7717/peerj-cs.502), 2021-05-21
Supplement: Supplemental_Data_S3.pdf [file Supplemental_Data_S3.pdf]

|       | No. | Missing | Mean | Median | Min | Max | Standard Deviation | Excess Kurtosis | Skewness |
|-------|-----|---------|------|--------|-----|-----|--------------------|-----------------|----------|
| PEOU1 | 1   | 0       | 5.96 | 6      | 3   | 7   | 0.916              | 0.63            | -0.724   |
| PEOU2 | 2   | 0       | 5.72 | 6      | 3   | 7   | 1.217              | 0.181           | -0.945   |
| PEOU3 | 3   | 0       | 5.86 | 6      | 4   | 7   | 0.895              | -0.849          | -0.232   |
| PEOU4 | 4   | 0       | 5.48 | 6      | 2   | 7   | 1.22               | 0.019           | -0.599   |
| PEOU5 | 5   | 0       | 5.94 | 6      | 3   | 7   | 1.047              | 1.686           | -1.278   |
| PEOU6 | 6   | 0       | 5.72 | 6      | 2   | 7   | 1.201              | 1.163           | -1.077   |
| PU1   | 7   | 0       | 5.9  | 6      | 3   | 7   | 1.204              | 0.535           | -1.148   |
| PU2   | 8   | 0       | 5.62 | 6      | 1   | 7   | 1.384              | 1.078           | -1.144   |
| PU3   | 9   | 0       | 5.7  | 6      | 1   | 7   | 1.345              | 1.562           | -1.204   |
| PU4   | 10  | 0       | 5.88 | 6      | 4   | 7   | 0.993              | -0.772          | -0.51    |
| PU5   | 11  | 0       | 6.28 | 6      | 4   | 7   | 0.776              | 1.143           | -1.077   |
| PU6   | 12  | 0       | 6.34 | 7      | 4   | 7   | 0.764              | 0.33            | -0.959   |
| QOS1  | 13  | 0       | 5.82 | 6      | 3   | 7   | 1.052              | -0.263          | -0.687   |
| QOS2  | 14  | 0       | 6.16 | 6      | 4   | 7   | 0.784              | -0.403          | -0.555   |
| QOS3  | 15  | 0       | 6.14 | 6      | 4   | 7   | 0.825              | -0.776          | -0.493   |
| QOS4  | 16  | 0       | 6.42 | 7      | 4   | 7   | 0.666              | 1.98            | -1.162   |
| Enj1  | 17  | 0       | 5.9  | 6      | 3   | 7   | 0.985              | 0.356           | -0.829   |
| Enj2  | 18  | 0       | 6.1  | 6      | 4   | 7   | 0.831              | -0.22           | -0.626   |
| Enj3  | 19  | 0       | 5.92 | 6      | 3   | 7   | 1.017              | 0.279           | -0.894   |
| ITU1  | 20  | 0       | 6.16 | 6      | 3   | 7   | 0.88               | 2.132           | -1.234   |
| ITU2  | 21  | 0       | 5.92 | 6      | 2   | 7   | 1.036              | 2.685           | -1.281   |
| ITU3  | 22  | 0       | 5.94 | 6      | 2   | 7   | 1.121              | 2.241           | -1.372   |
| PS1   | 23  | 0       | 5.94 | 6      | 3   | 7   | 0.925              | 0.751           | -0.814   |
| PS2   | 24  | 0       | 5.96 | 6      | 2   | 7   | 1.038              | 3.738           | -1.575   |
| PS3   | 25  | 0       | 5.9  | 6      | 3   | 7   | 1.1                | 0.878           | -1.097   |
| T1    | 26  | 0       | 6.3  | 6      | 4   | 7   | 0.755              | 0.271           | -0.863   |
| T2    | 27  | 0       | 6.22 | 6      | 4   | 7   | 0.782              | -0.241          | -0.678   |
| T3    | 28  | 0       | 6.06 | 6      | 3   | 7   | 0.968              | 0.985           | -1.08    |
| T4    | 29  | 0       | 6.32 | 6      | 4   | 7   | 0.76               | 0.295           | -0.91    |
| T5    | 30  | 0       | 5.96 | 6      | 3   | 7   | 0.916              | 2.43            | -1.208   |
| T6    | 31  | 0       | 5.9  | 6      | 3   | 7   | 1.005              | 0.127           | -0.768   |
| T7    | 32  | 0       | 6.04 | 6      | 4   | 7   | 0.894              | 0.001           | -0.775   |
| T8    | 33  | 0       | 5.9  | 6      | 3   | 7   | 0.964              | 0.368           | -0.759   |
| T9    | 34  | 0       | 6.1  | 6      | 4   | 7   | 0.831              | -0.22           | -0.626   |
| AP1   | 35  | 0       | 6.3  | 7      | 4   | 7   | 0.806              | -0.206          | -0.85    |
| AP2   | 36  | 0       | 6.16 | 6      | 3   | 7   | 0.946              | 1.429           | -1.211   |
| AP3   | 37  | 0       | 5.32 | 6      | 1   | 7   | 1.378              | 0.58            | -0.937   |
| AP4   | 38  | 0       | 5.56 | 6      | 2   | 7   | 1.344              | 0.089           | -0.82    |
| ATS1  | 39  | 0       | 5.92 | 6      | 4   | 7   | 0.891              | -0.713          | -0.363   |
| ATS2  | 40  | 0       | 5.76 | 6      | 3   | 7   | 1.05               | -0.3            | -0.67    |
| ATS3  | 41  | 0       | 5.9  | 6      | 4   | 7   | 1.005              | -0.603          | -0.646   |
